# Supplementary material
Source: publisher figshare collection journal article supplement (https://acs.figshare.com/ndownloader/files/8623006)
Supplement: Supplementary file 1 [file 8623006]

**Supporting Information**

**Genomic DNA Interactions Mechanize Peptidotoxin-mediated Anti-cancer**

**Nanotherapy**

Santosh K. Misra, Aaron S. Schwartz-Duval and Dipanjan Pan\*

Departments of Bioengineering, Materials Science and Engineering and Beckman Institute,

University of Illinois at Urbana-Champaign, Mills Breast Cancer Institute, and Carle

Foundation Hospital, Urbana, Illinois 61801, USA.

\*Corresponding author. Email: (dipanjan@illinois.edu).

| <b>Title of Contents</b>                                   | <b>Page No.</b> |
|------------------------------------------------------------|-----------------|
| 1. Schematic representation of Nano-peptidotoxin synthesis | S3              |
| 2. Genomic DNA interaction studies                         | S4              |

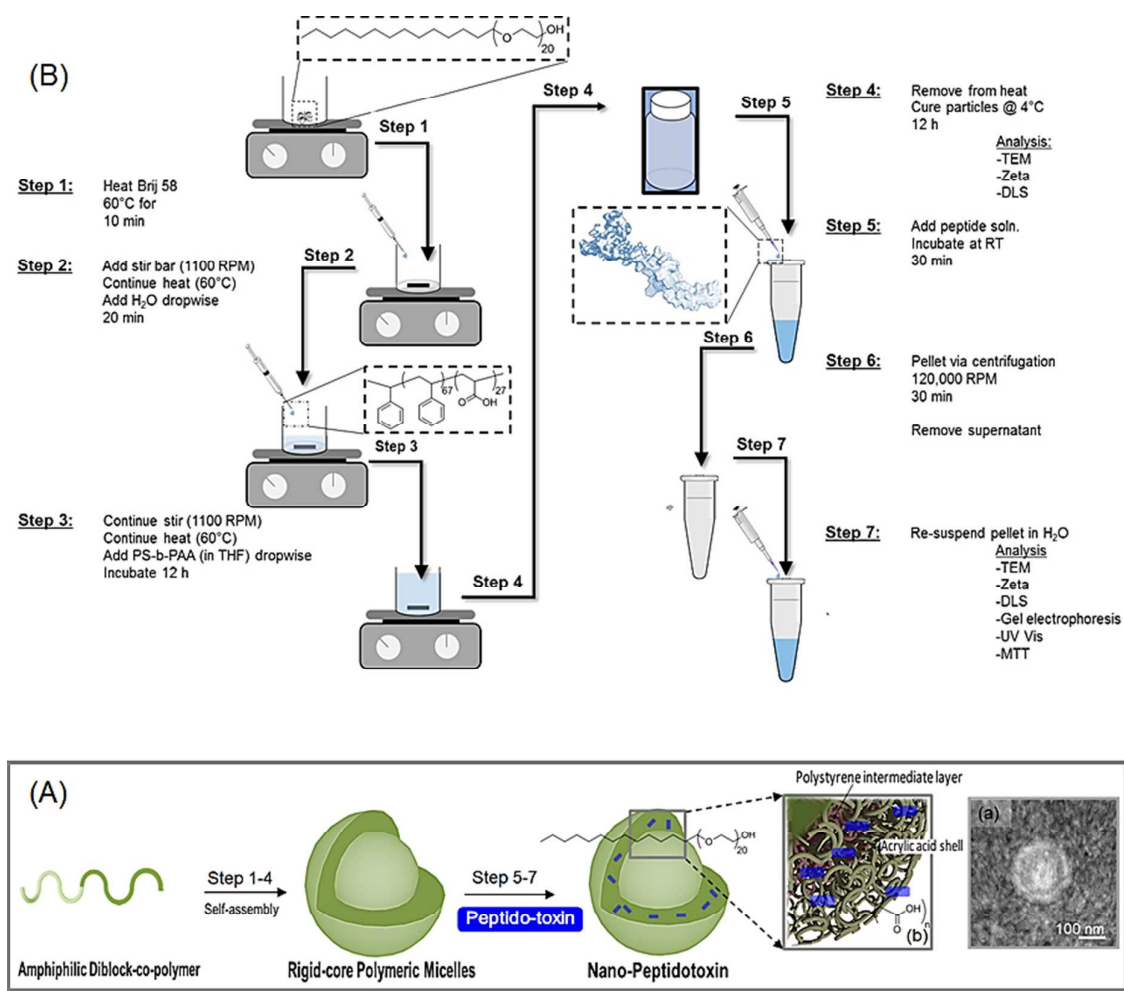

**Scheme S1.** Schematic representation of Nano-peptidotoxin synthesis from self-assembly of amphiphilic diblock-co-polymer. (A) A representative transmission electron microscopy (TEM) image of a particle; (B) Stepwise formation of Nano-peptidotoxin and the check points depicting the detailed protocol for peptide insertion and physico-chemical characterization for confirming the formation of Nano-peptidotoxin.

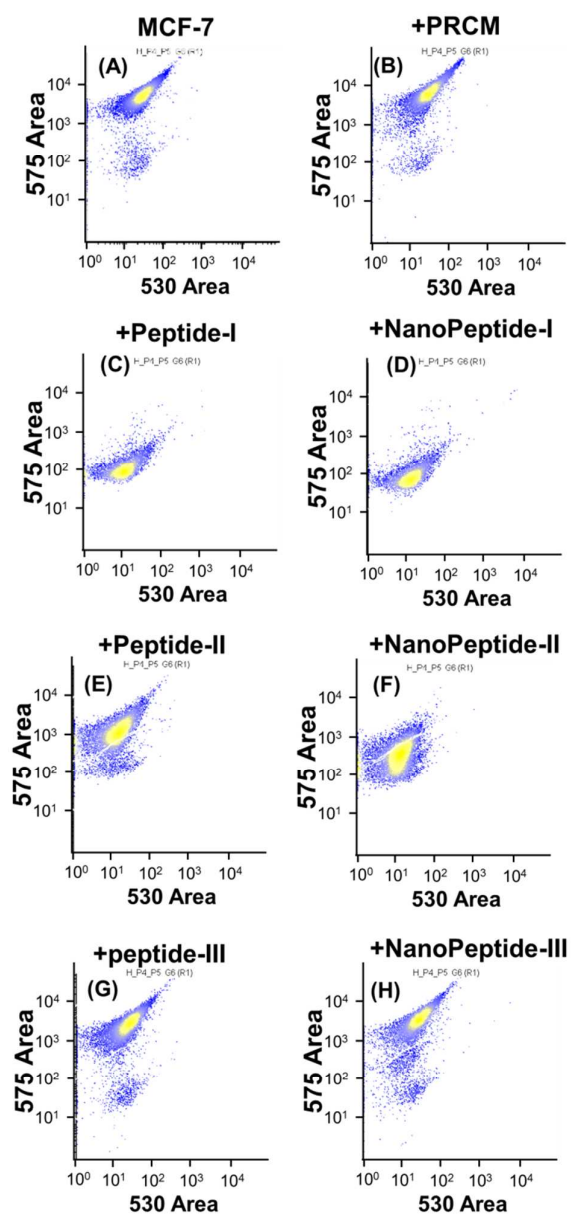

**Figure S2.** Genomic DNA interaction studies. PI intercalation modulated by DNA-peptide interactions after incubation of MCF-7 cells with Peptide-I, Peptide-II and CtrPT and their nanoforms for 4h at ambient culture condition. Scattering patterns for shift in scattering pattern of cell population treated with Peptide-I, Peptide-II, NanoPeptide-I and Nano-CtrPT as yellow population with low PI intensity. Blue cell population represents cells with high PI intensity.
